# Supplementary material for: Associations of Biopterins and ADMA with Vascular Function in Peripheral Microcirculation from Patients with Chronic Kidney Disease
Source: MDPI journal article supplement (doi:10.3390/ijms24065582), 2023-03-15
Supplement: s1 [file s1]

**Associations of Biopterins and ADMA with Vascular Function in Peripheral Microcirculation from Patients with Chronic Kidney Disease**

**Authors:** Samsul Arefin<sup>1</sup>, Lars Löfgren<sup>2</sup>, Peter Stenvinkel<sup>1</sup>, Anna B. Granqvist<sup>2</sup> and Karolina Kublickiene<sup>1,\*</sup>

<sup>1</sup> Department of Clinical Science, Intervention & Technology, Division of Renal Medicine, Karolinska Institutet, 141 86 Stockholm, Sweden

<sup>2</sup> Early CVRM, BioPharmaceuticals R&D, AstraZeneca, 431 50 Mölndal, Sweden

\* Correspondence: karolina.kublickiene@ki.se

**Figure S1:** Endothelium-dependent vasodilation reflected by reactive hyperemia index (RHI) (A) and stiffness reflected by augmentation index (AI@75) (B) between control, CKD-3 and CKD-5 groups. Data are expressed as median (interquartile range); significances were assessed by Mann-Whitney U test.  $P < 0.05$ . CKD-3= chronic kidney disease stage 3; CKD-5= chronic kidney disease stage 5.

**Figure S2:** Contribution of NO and EDHF in controls and CKD-5. Data are expressed as median (interquartile range); significances were assessed by Mann-Whitney U test; NO =Nitric oxide; EDHF = endothelium-derived hyperpolarizing factor; CKD-5= chronic kidney disease stage 5

**Figure S3:** Concentration response curve to bradykinin (BK) induced relaxation in arteries before and after indomethacin inhibition in controls (A) and ESKD (B) participants. Data are expressed as mean  $\pm$  SEM; significances were assessed by two-way ANOVA; PSS= physiological salt solution; ESKD= end stage kidney disease.

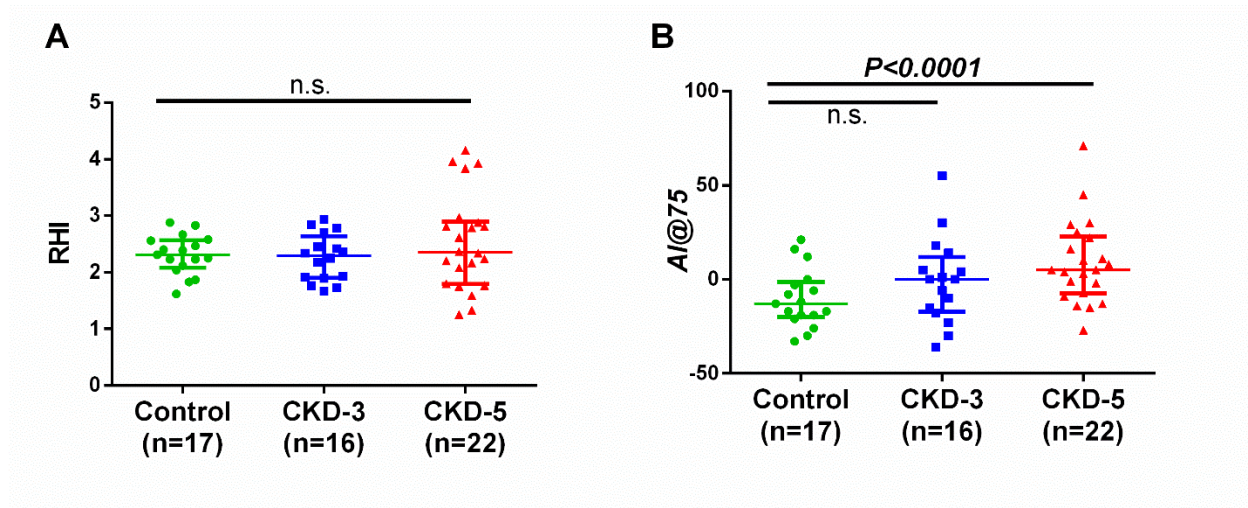

**Figure S1:** Endothelium-dependent vasodilation reflected by reactive hyperemia index (RHI) (A) and stiffness reflected by augmentation index (AI@75) (B) between control, CKD-3 and CKD-5 groups. Data are expressed as median (interquartile range); significances were assessed by Mann-Whitney U test.  $P < 0.05$ . CKD-3= chronic kidney disease stage 3; CKD-5= chronic kidney disease stage 5.

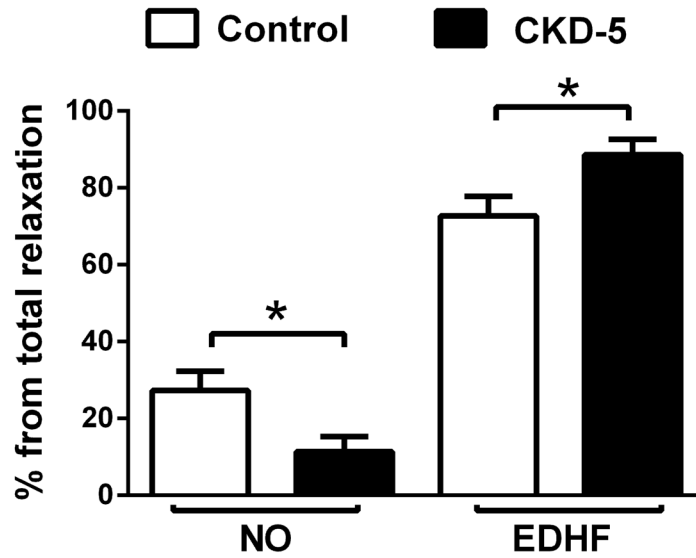

**Figure S2:** Contribution of NO and EDHF in controls and CKD-5 participants. Data are expressed as median (interquartile range); significances were assessed by Mann-Whitney U test; NO =Nitric oxide; EDHF = endothelium-derived hyperpolarizing factor; CKD-5= chronic kidney disease stage 5

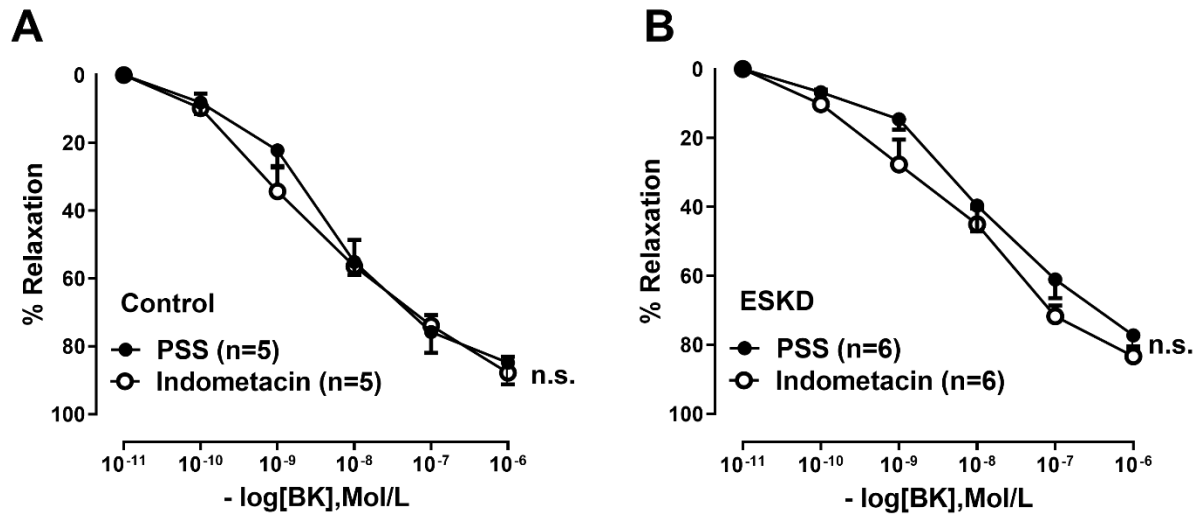

**Figure S3:** Concentration response curve to bradykinin (BK) induced relaxation in arteries before and after indomethacin inhibition in controls (A) and ESKD (B) participants. Data are expressed as mean  $\pm$  SEM; significances were assessed by two-way ANOVA; PSS= physiological salt solution; ESKD= end stage kidney disease.
